# Supplementary material for: The Effects of the Steroids 5-Androstenediol and Dehydroepiandrosterone and Their Synthetic Derivatives on the Viability of K562, HeLa, and Wi-38 Cells and the Luminol-Stimulated Chemiluminescence of Peripheral Blood Mononuclear Cells from Healthy Volunteers
Source: MDPI journal article supplement (doi:10.3390/biom14030373), 2024-03-19

**Table S1.** Crystal data and details of X-ray analysis.

|                                                            | <b>2</b>                                              | <b>3d</b>                                                     |
|------------------------------------------------------------|-------------------------------------------------------|---------------------------------------------------------------|
| Formula                                                    | C <sub>20</sub> H <sub>34</sub> O <sub>3</sub>        | C <sub>20</sub> H <sub>30</sub> O <sub>4</sub> S <sub>1</sub> |
| <i>F</i> <sub>w</sub>                                      | 322.47                                                | 366.50                                                        |
| colour, habit                                              | colourless, needle                                    | colourless, prism                                             |
| cryst size (mm)                                            | 0.20×0.03×0.02                                        | 0.25×0.25×0.20                                                |
| temperature (K)                                            | 100                                                   | 200                                                           |
| crystal system                                             | orthorhombic                                          | orthorhombic                                                  |
| space group                                                | <i>P</i> 2 <sub>1</sub> 2 <sub>1</sub> 2 <sub>1</sub> | <i>P</i> 2 <sub>1</sub> 2 <sub>1</sub> 2 <sub>1</sub>         |
| <i>a</i> (Å)                                               | 9.1865(5)                                             | 10.9534(3)                                                    |
| <i>b</i> (Å)                                               | 16.3097(8)                                            | 11.2324(3)                                                    |
| <i>c</i> (Å)                                               | 23.7715(12)                                           | 15.4057(4)                                                    |
| $\beta$ (deg)                                              | 90                                                    | 90                                                            |
| <i>V</i> (Å <sup>3</sup> )                                 | 3561.7(3)                                             | 1895.41(9)                                                    |
| <i>Z</i>                                                   | 8                                                     | 4                                                             |
| <i>D</i> <sub>c</sub> (g·cm <sup>-3</sup> )                | 1.203                                                 | 1.284                                                         |
| $\mu$ (mm <sup>-1</sup> )                                  | 0.078                                                 | 0.192                                                         |
| <i>F</i> (000)                                             | 1424                                                  | 792                                                           |
| $\theta$ range (deg)                                       | 2.12 to 26.98                                         | 2.24 to 28.00                                                 |
| refln collcd                                               | 58491                                                 | 27405                                                         |
| indep reflns / <i>R</i> <sub>int</sub>                     | 7771 / 0.0536                                         | 4563 / 0.0299                                                 |
| reflns <i>I</i> >2 $\sigma$ ( <i>I</i> )                   | 7080                                                  | 4206                                                          |
| No of param                                                | 439                                                   | 346                                                           |
| GooF on <i>F</i> <sup>2</sup>                              | 1.111                                                 | 1.039                                                         |
| <i>R</i> <sub>1</sub> ( <i>I</i> >2 $\sigma$ ( <i>I</i> )) | 0.0550                                                | 0.0348                                                        |
| <i>wR</i> <sub>2</sub> (all data)                          | 0.1316                                                | 0.0865                                                        |
| Flack parameter                                            | —                                                     | 0.00(2)                                                       |
| largest diff peak / hole (e·Å <sup>-3</sup> )              | 0.38 / -0.29                                          | 0.22 / -0.27                                                  |

$^1\text{H}$  and  $^{13}\text{C}$  spectra for the synthesized compounds

**2**  $^1\text{H}$

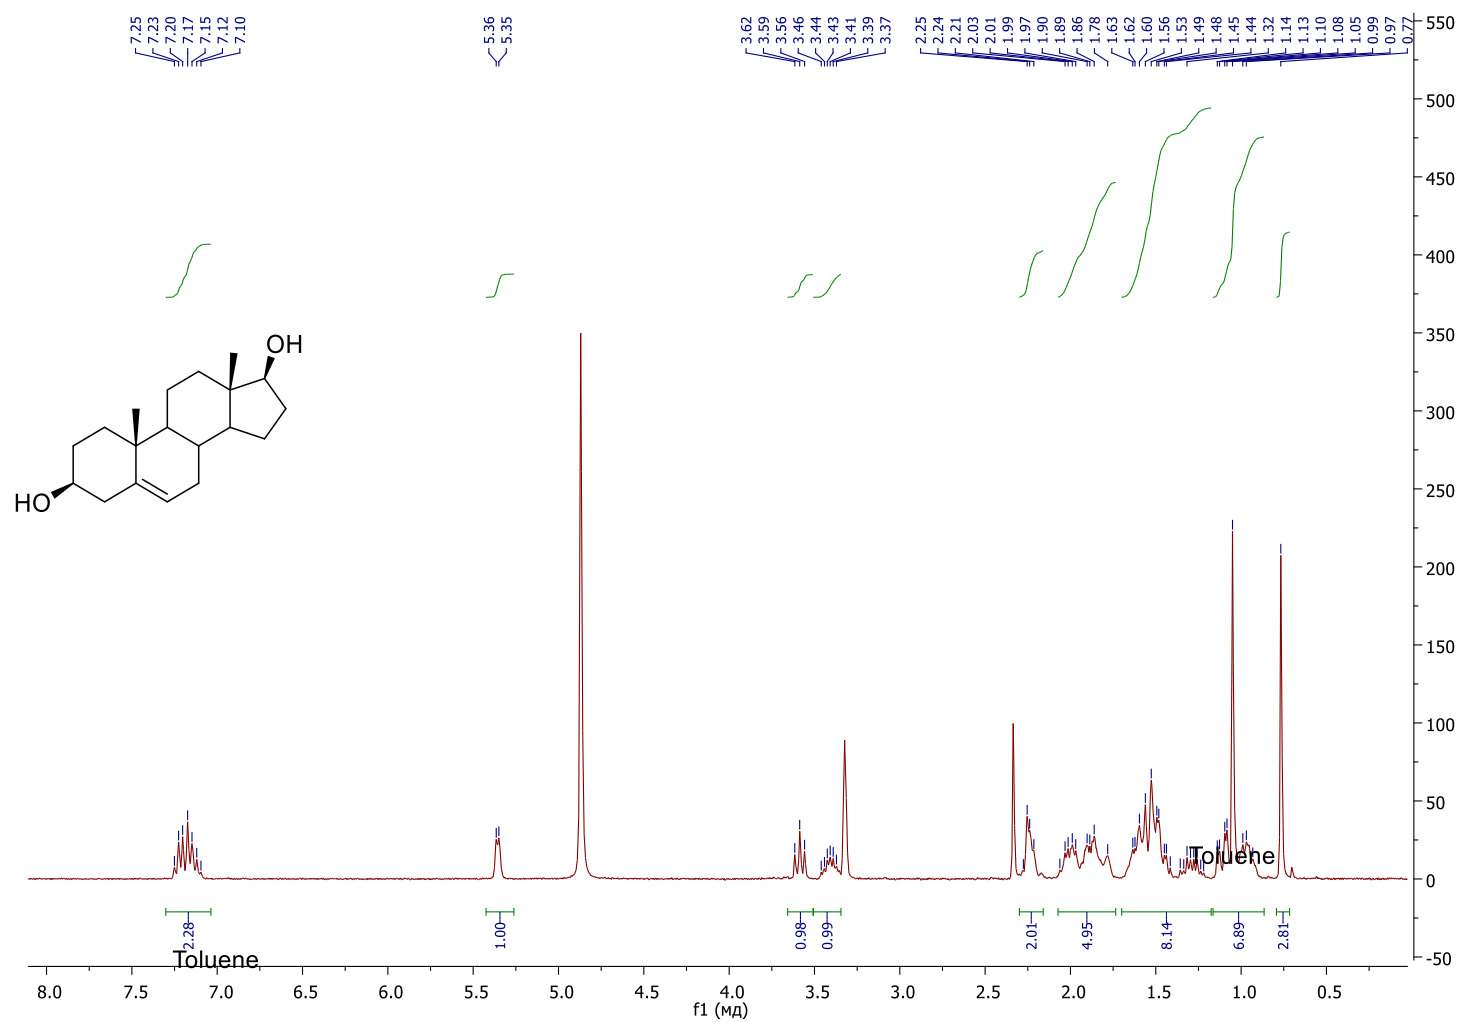

2 <sup>13</sup>C

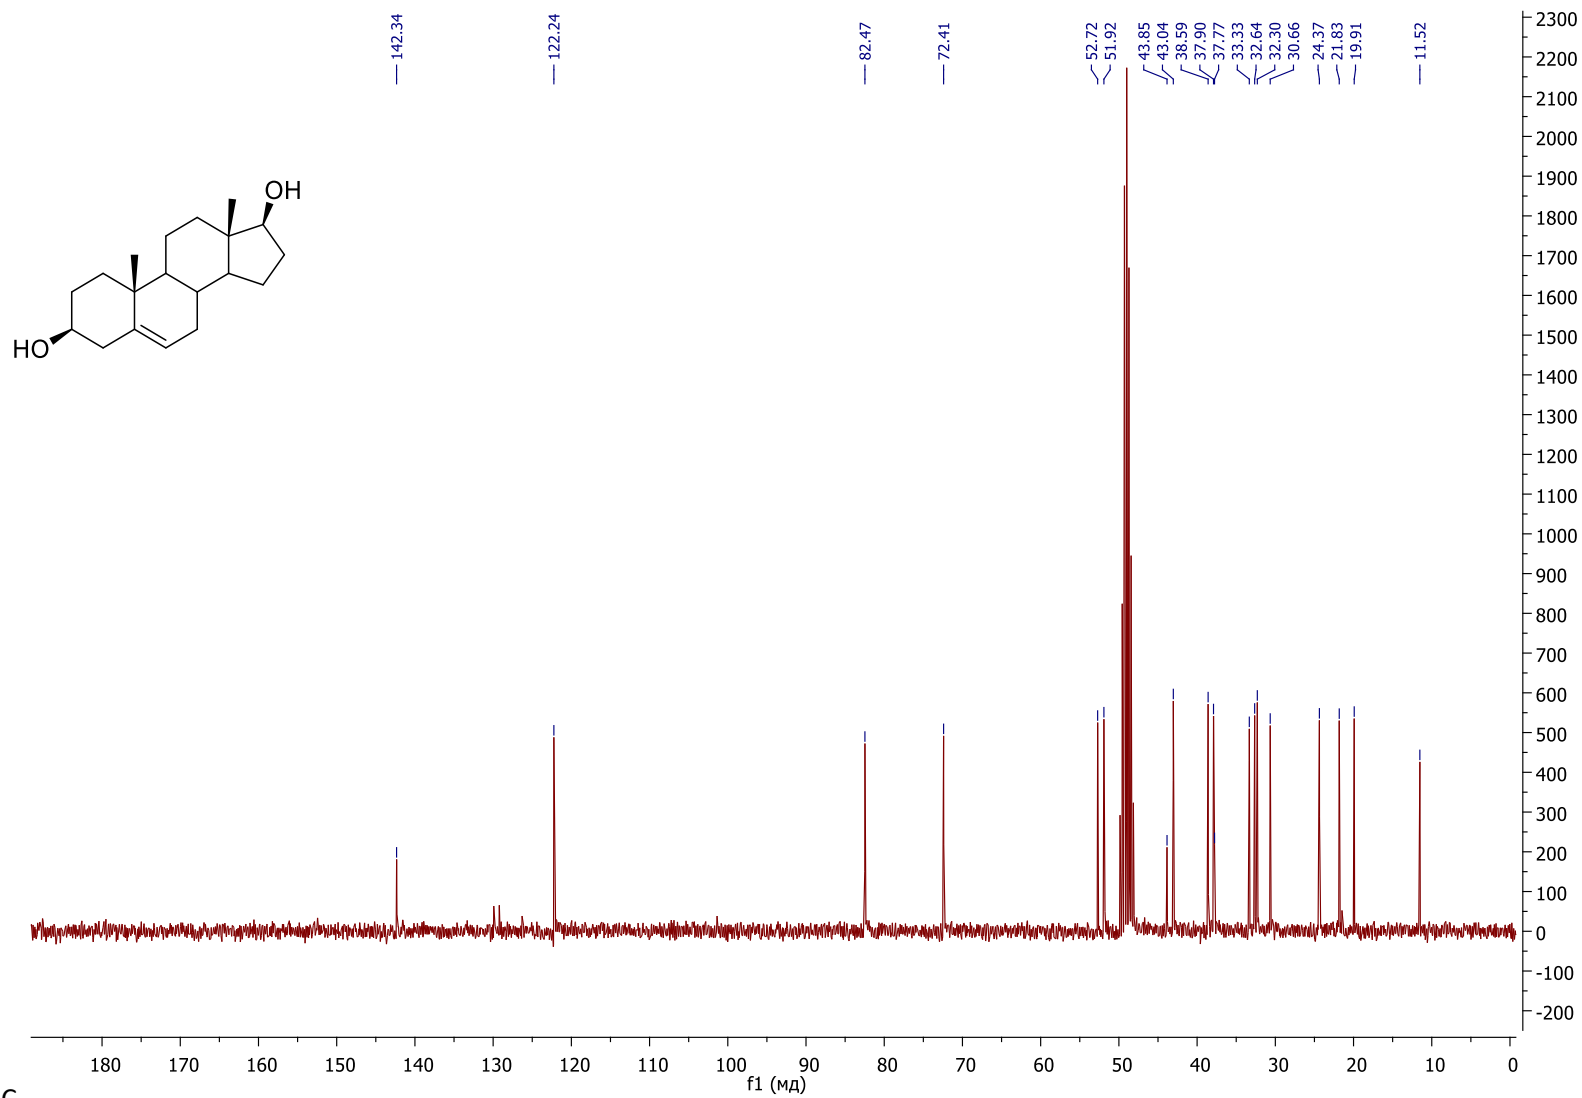

# 3a <sup>1</sup>H

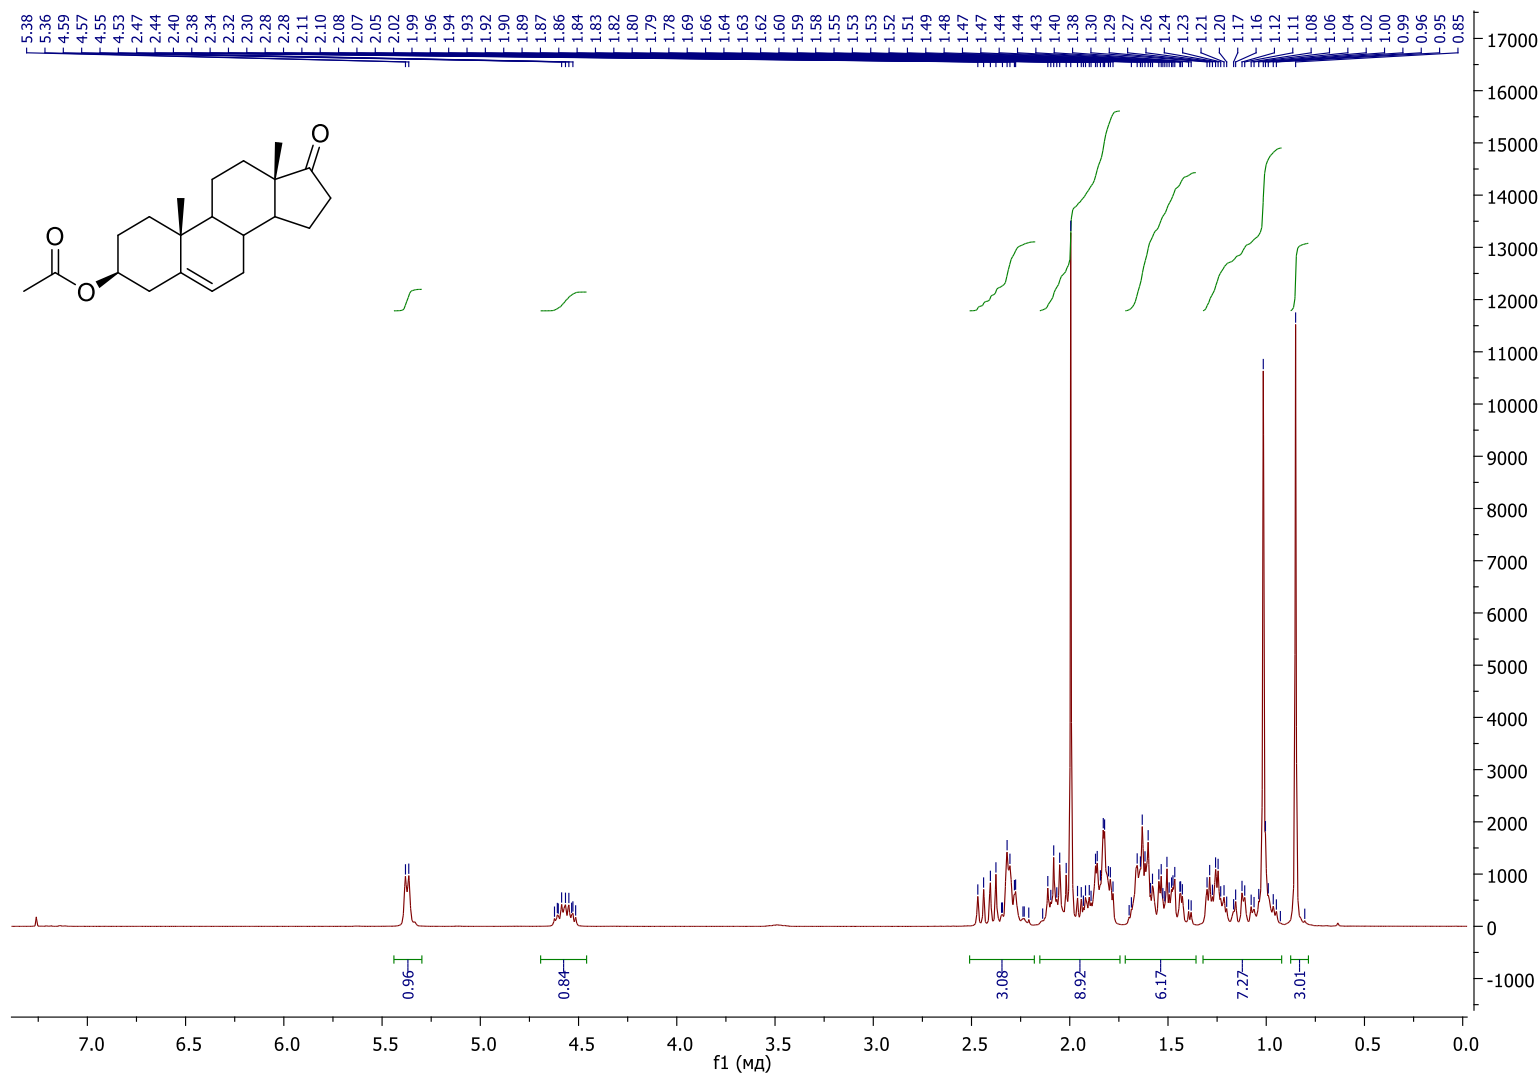

# 3a 13C

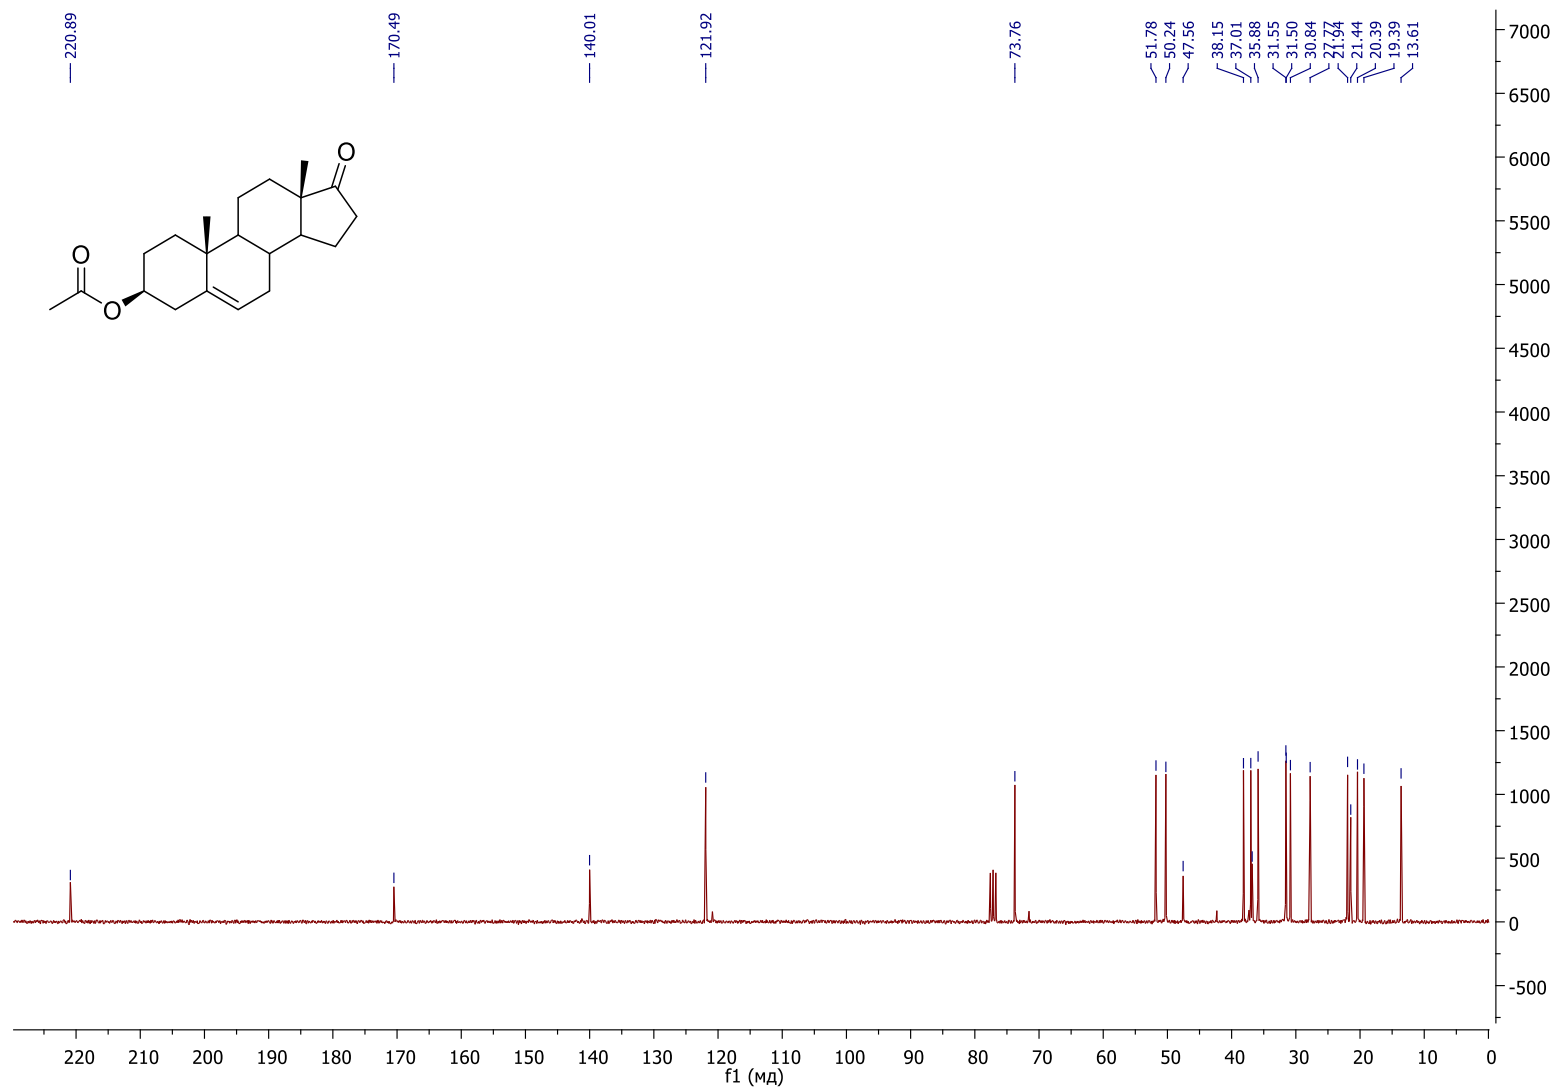

# 3b <sup>1</sup>H

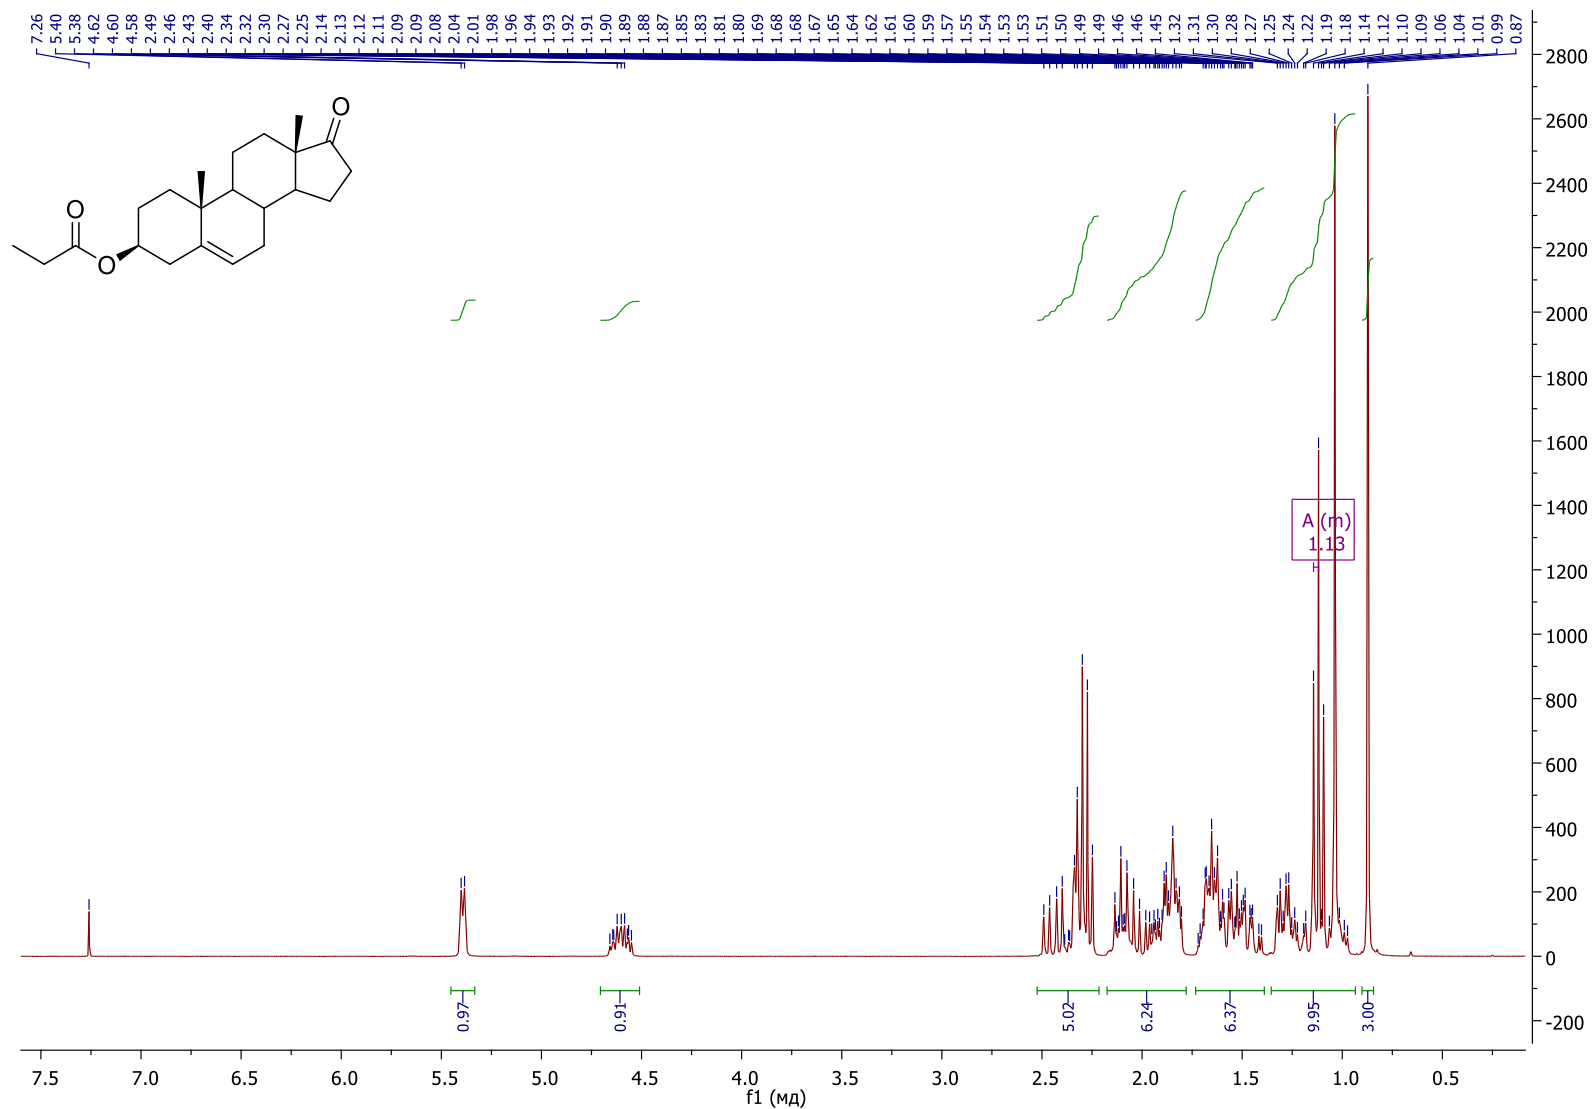

**3b** <sup>13</sup>C

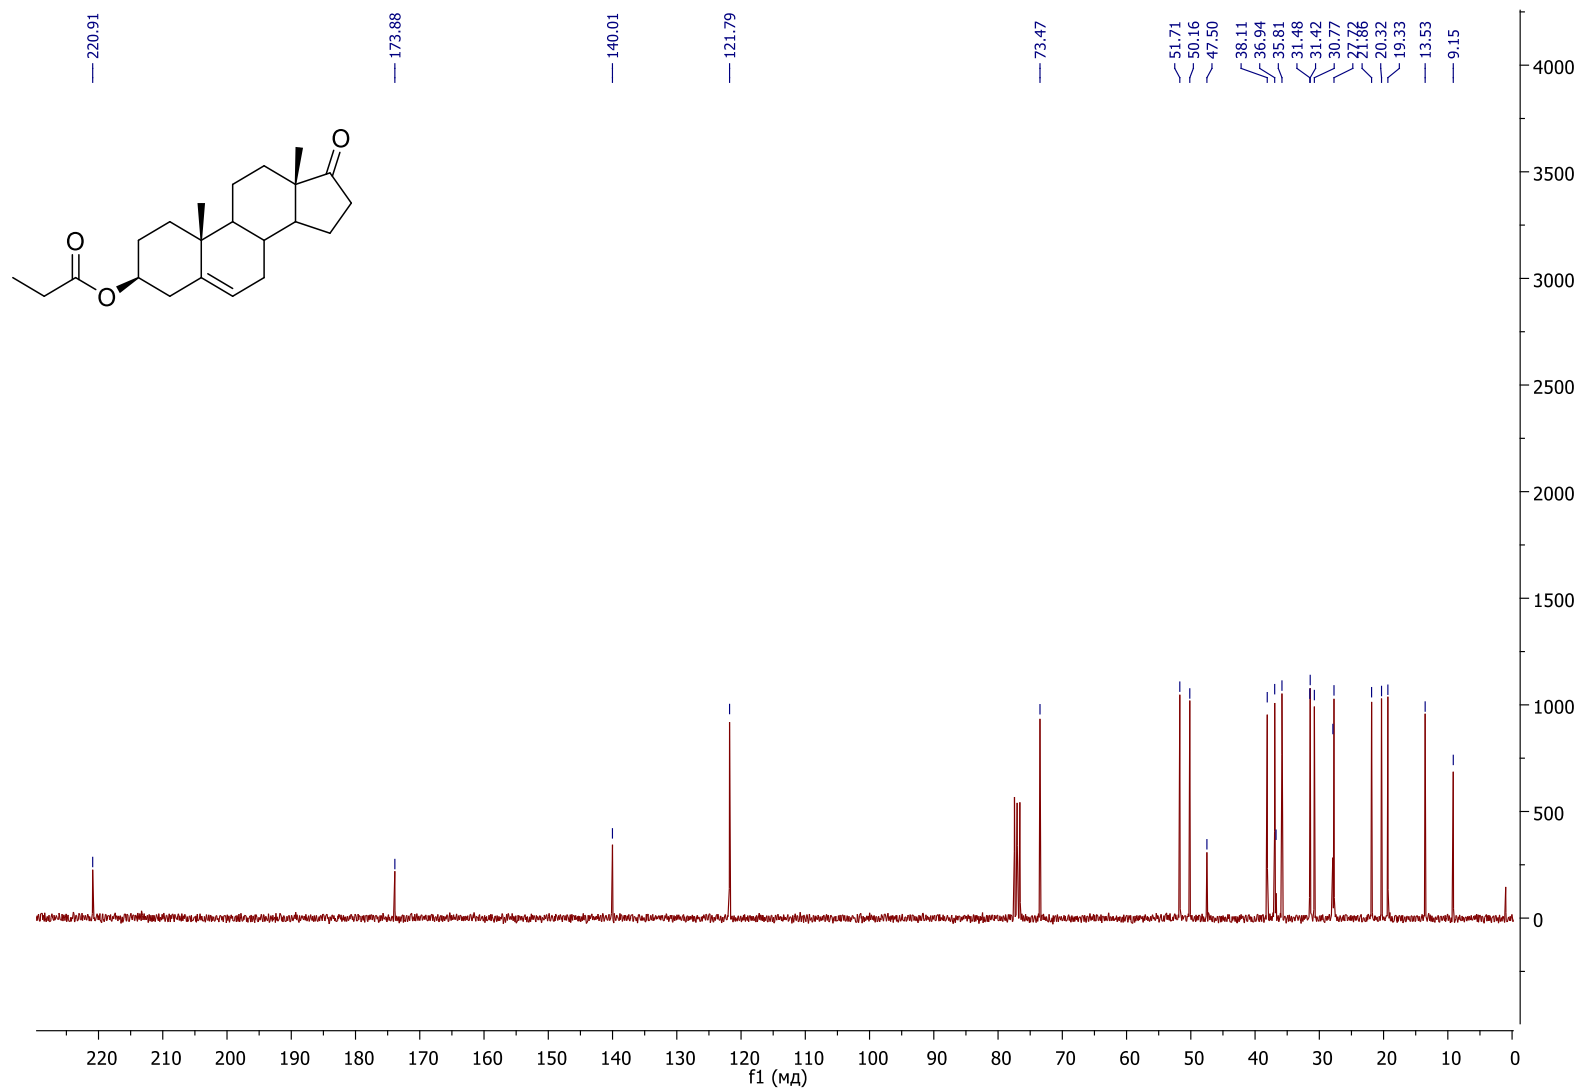

**3c 1H**

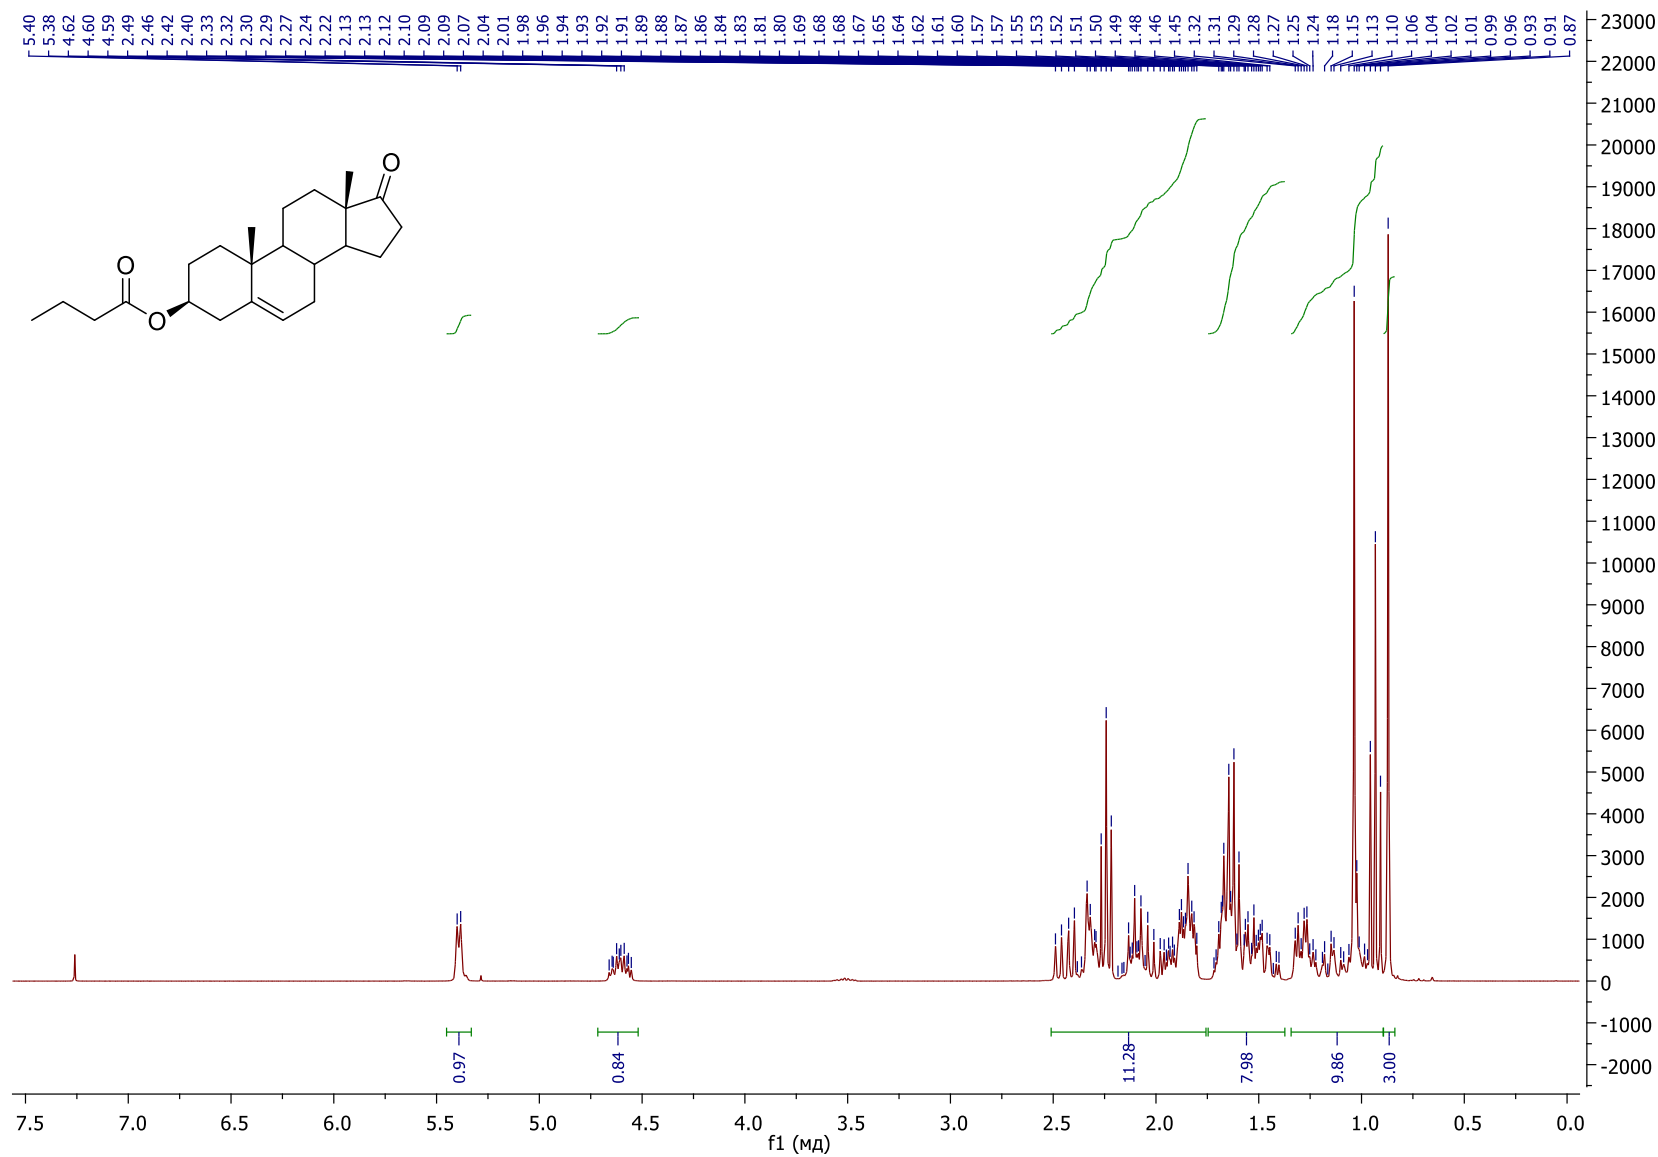



**3c** <sup>13</sup>C

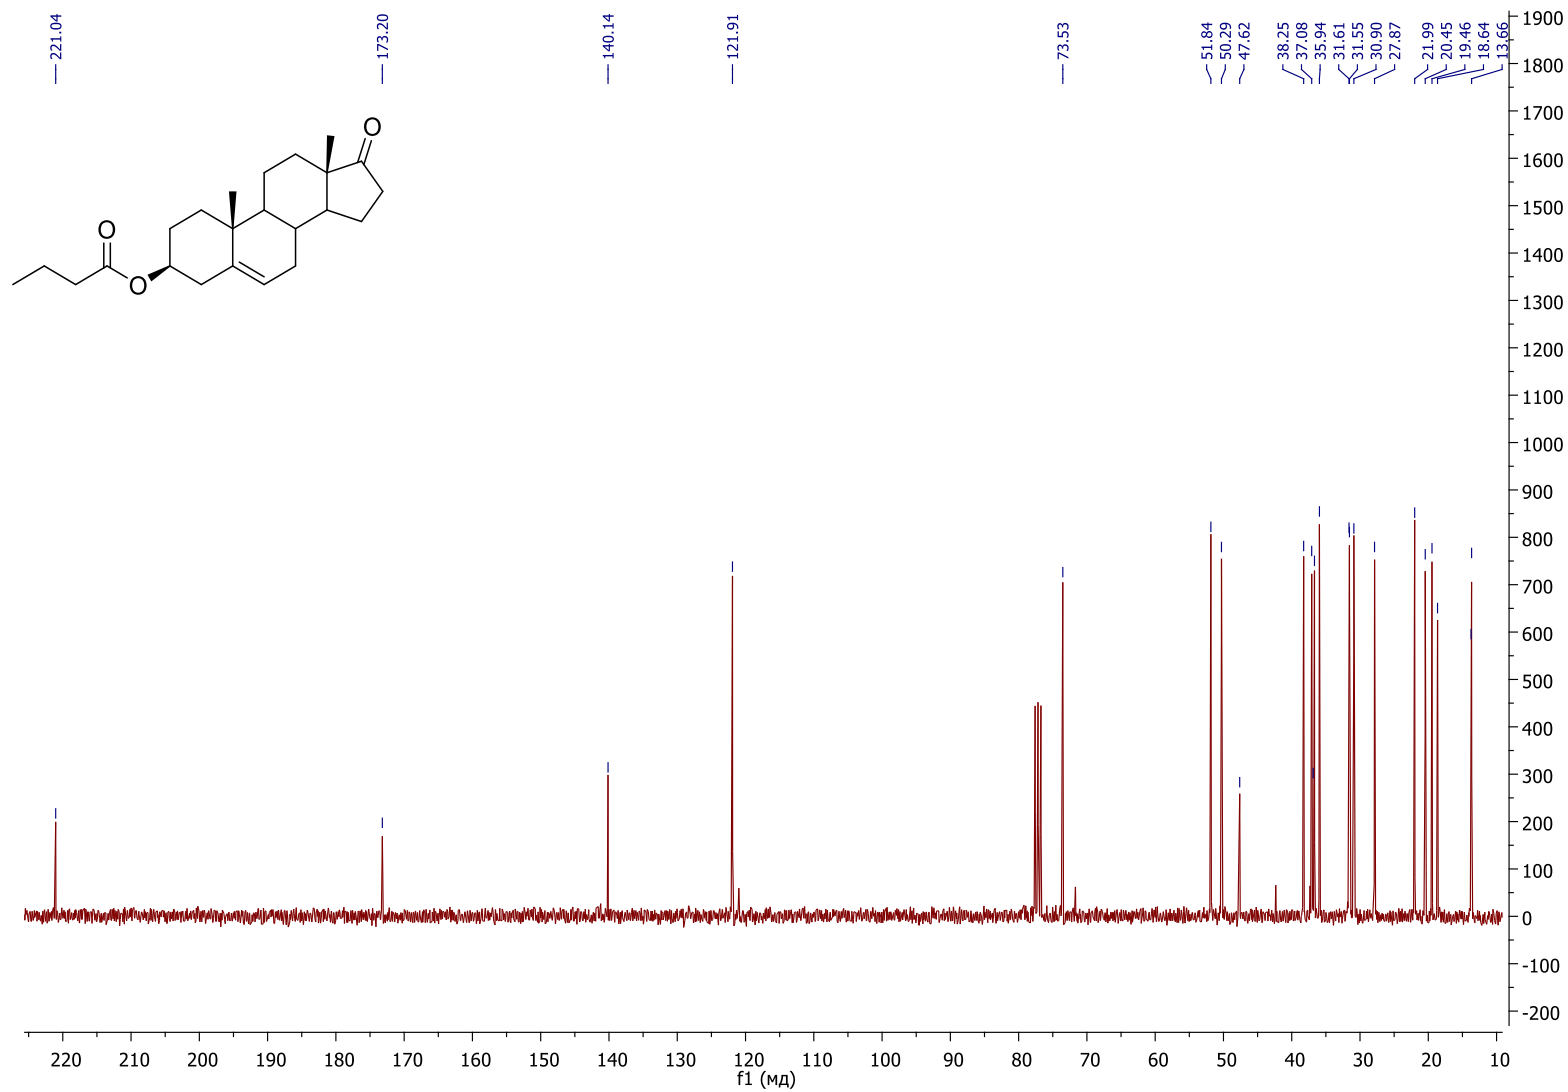

# 3d <sup>1</sup>H

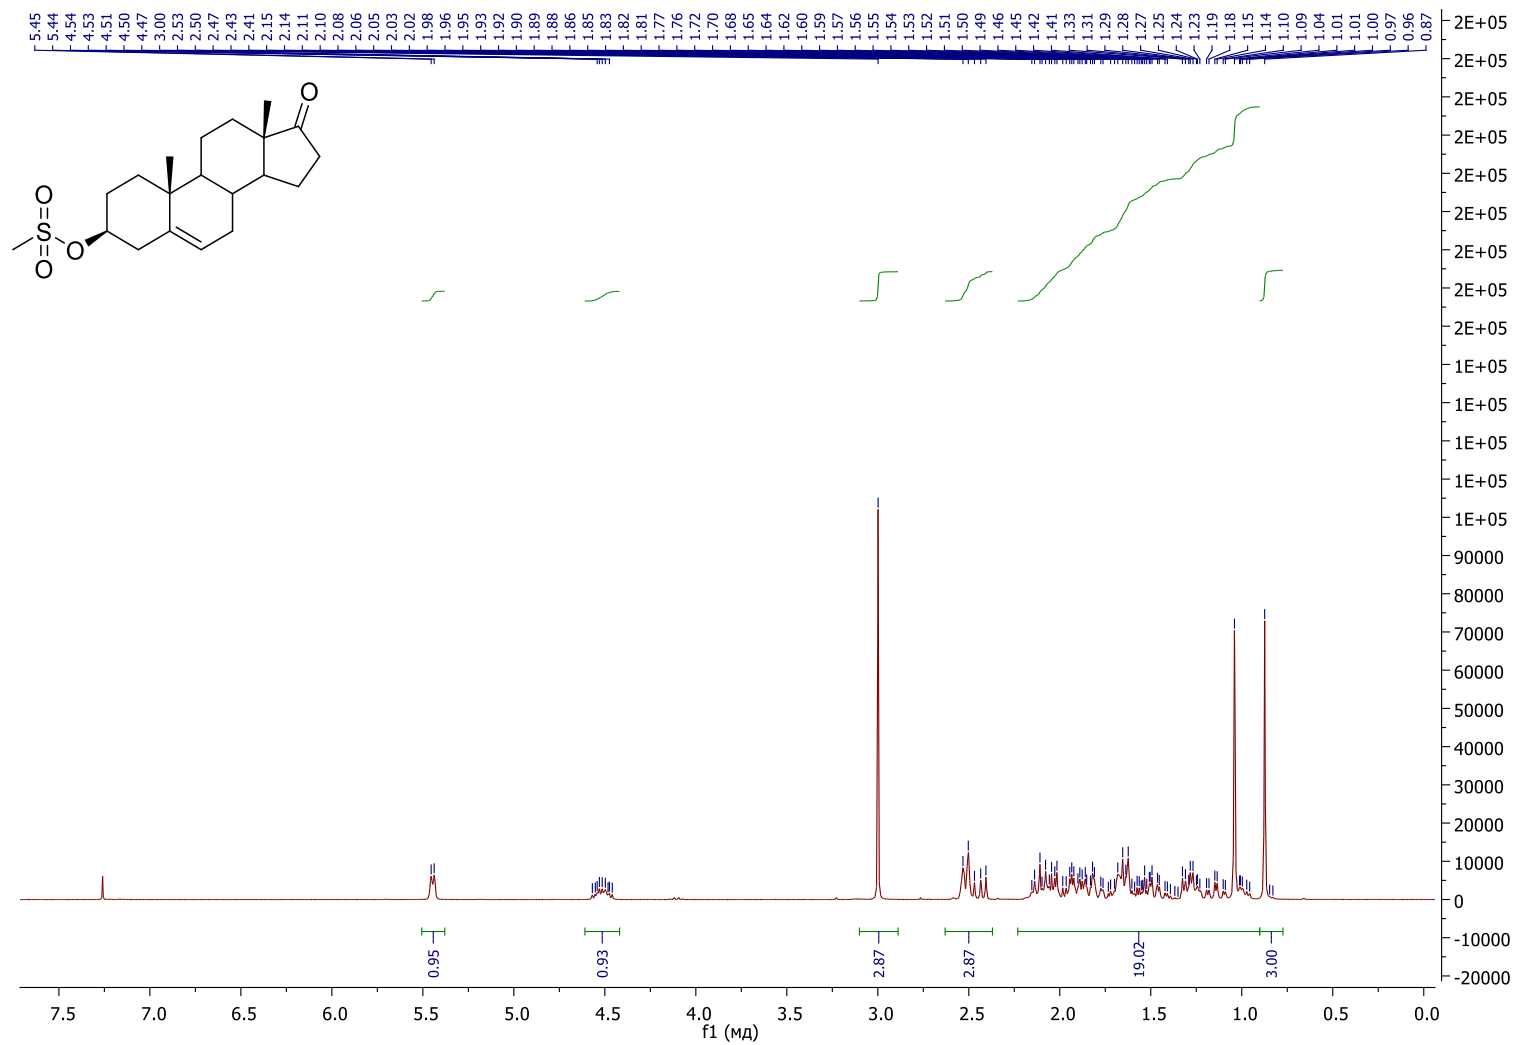

3d 13C

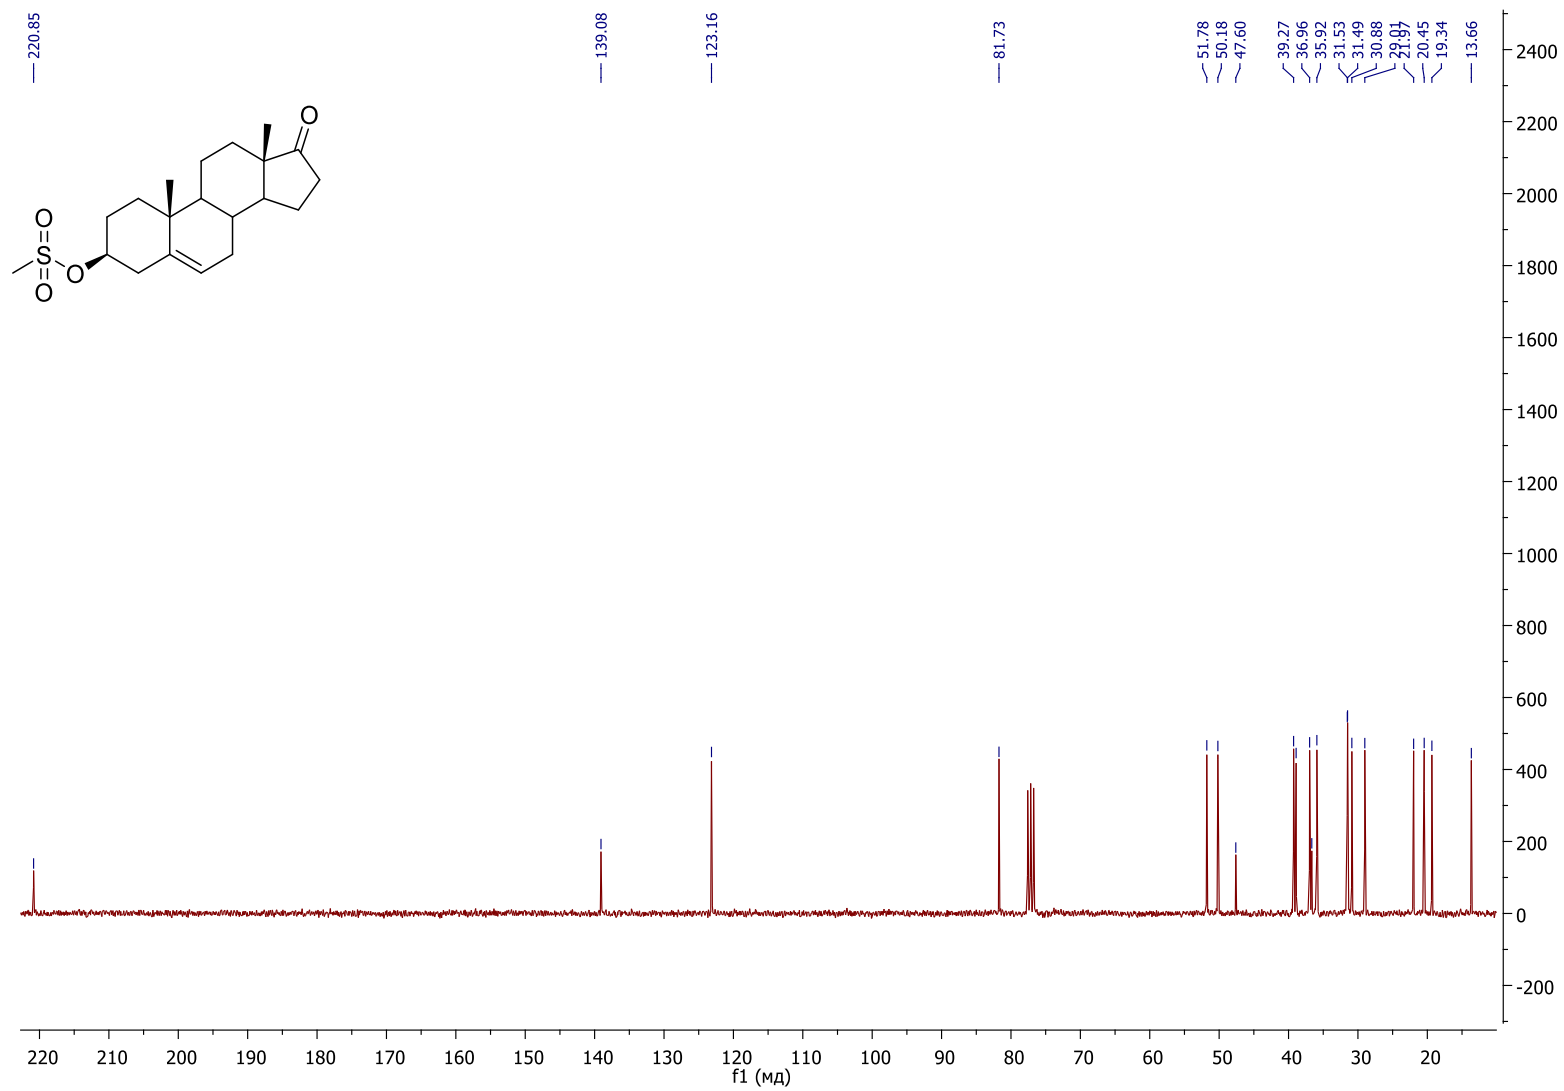

**4b <sup>1</sup>H**

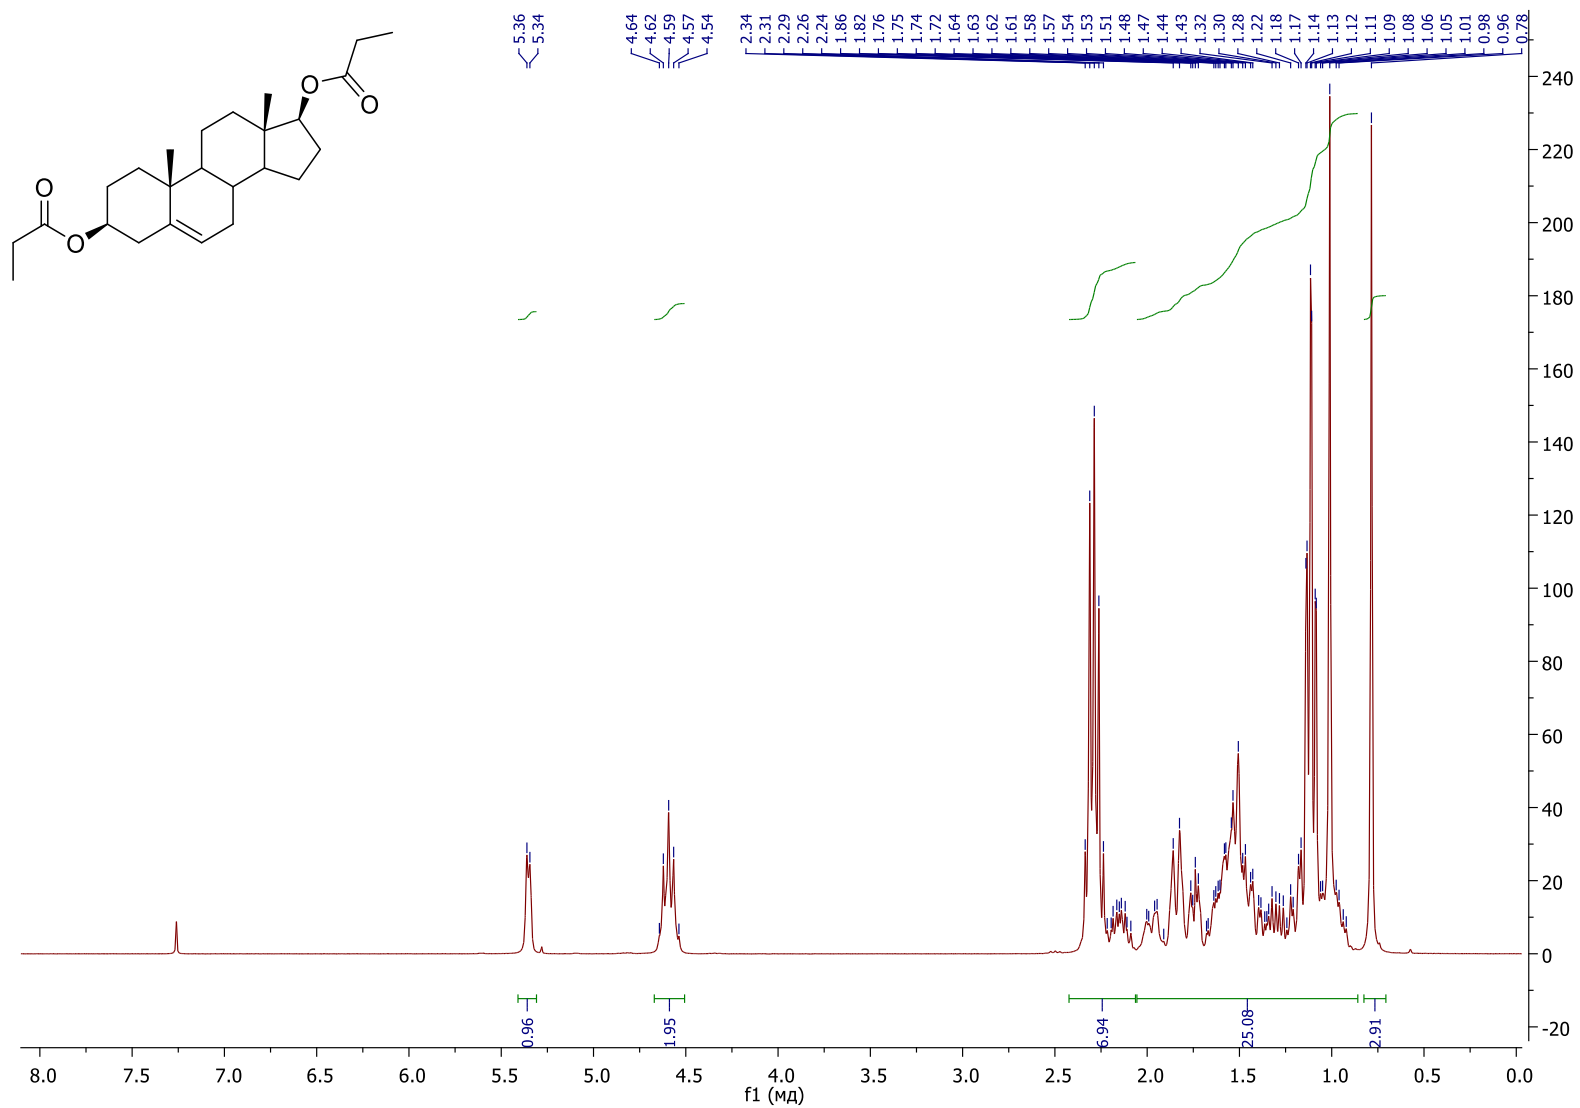

# 4b 13C

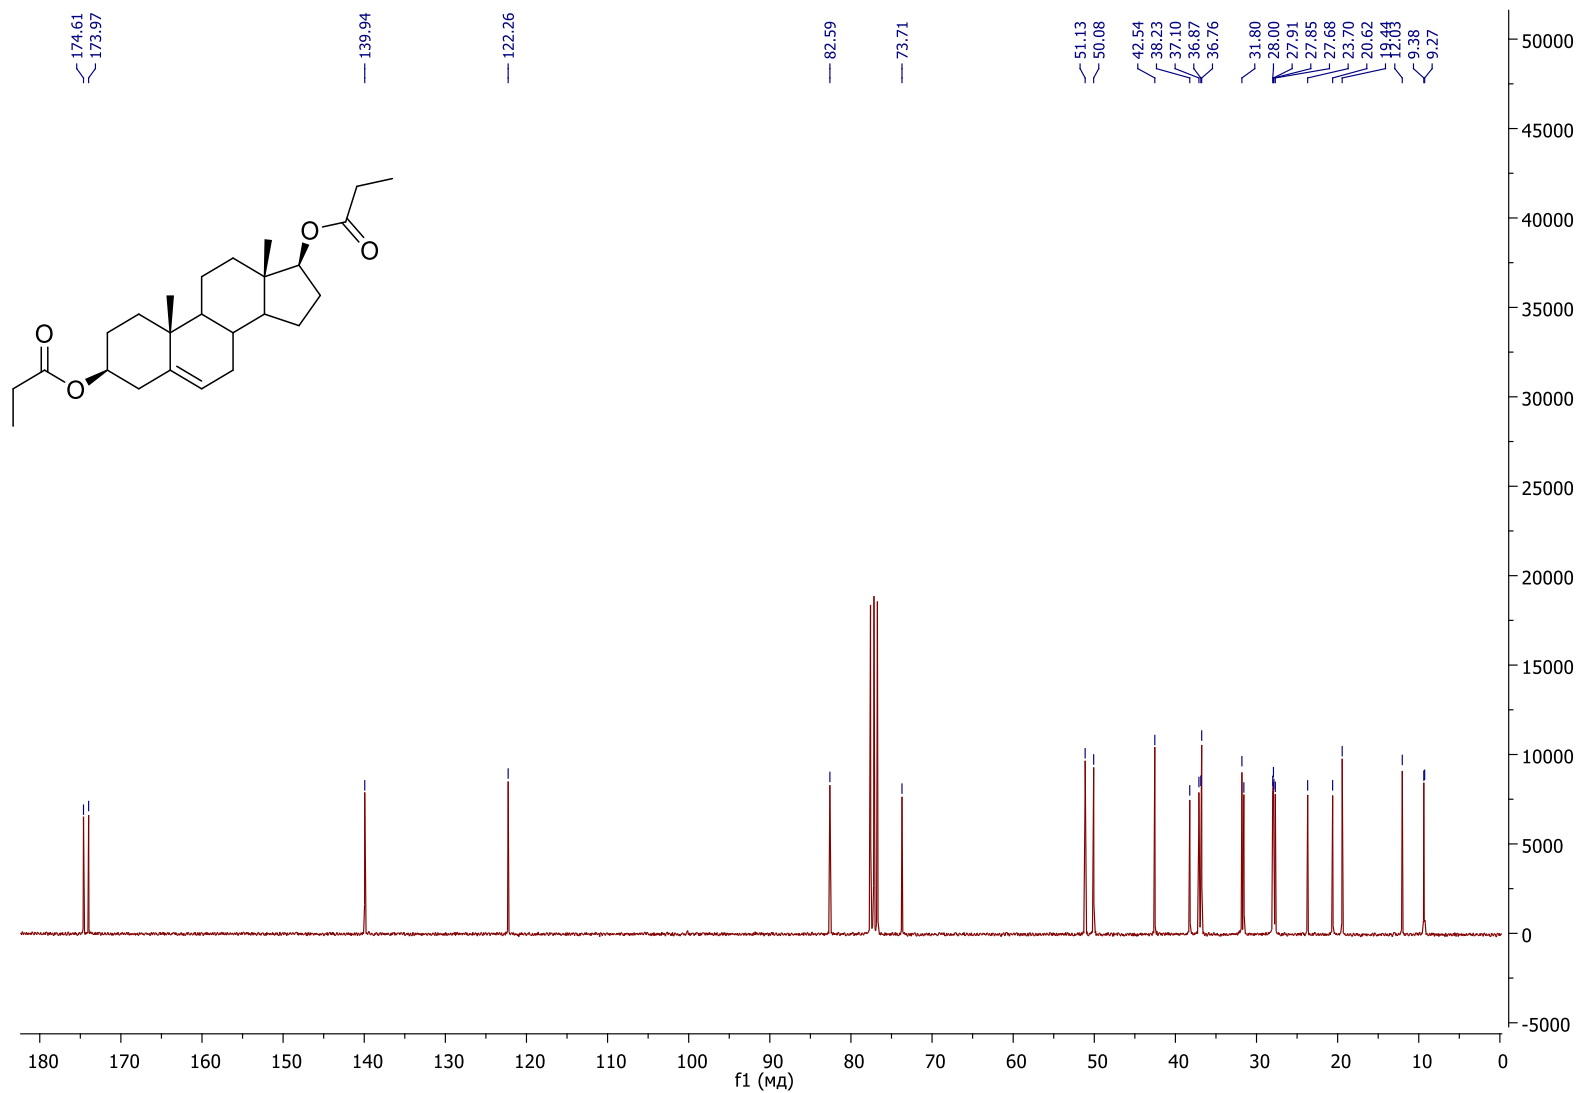

4c <sup>1</sup>H

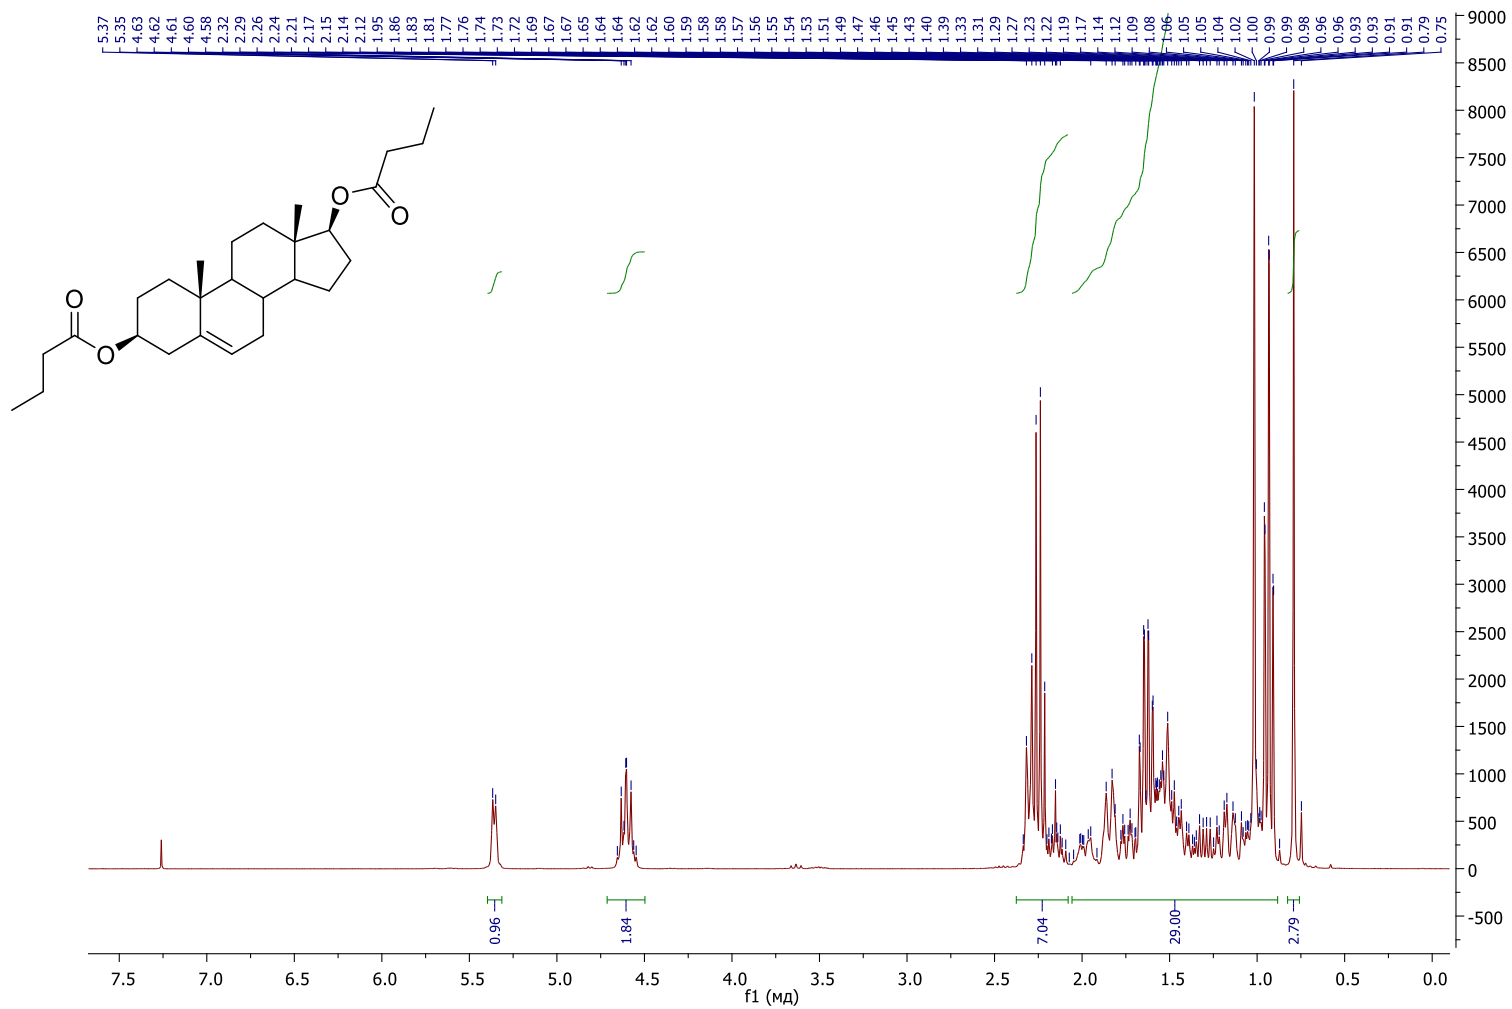

# 4c <sup>13</sup>C

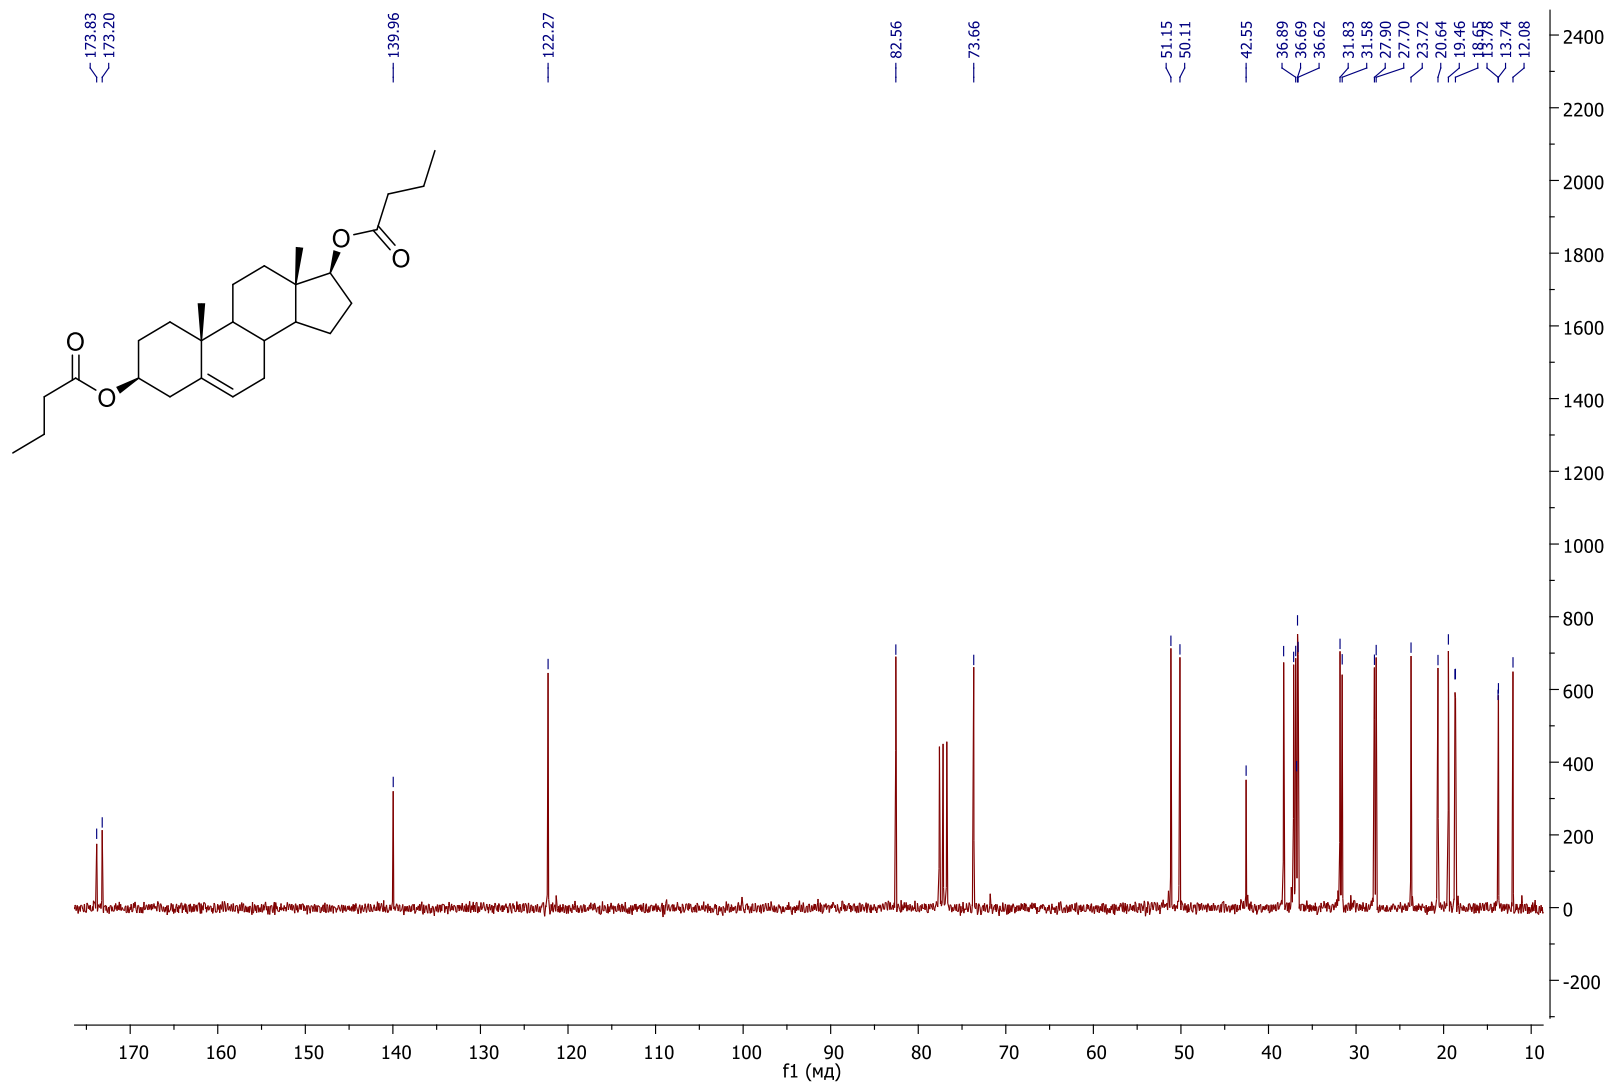

5 1H

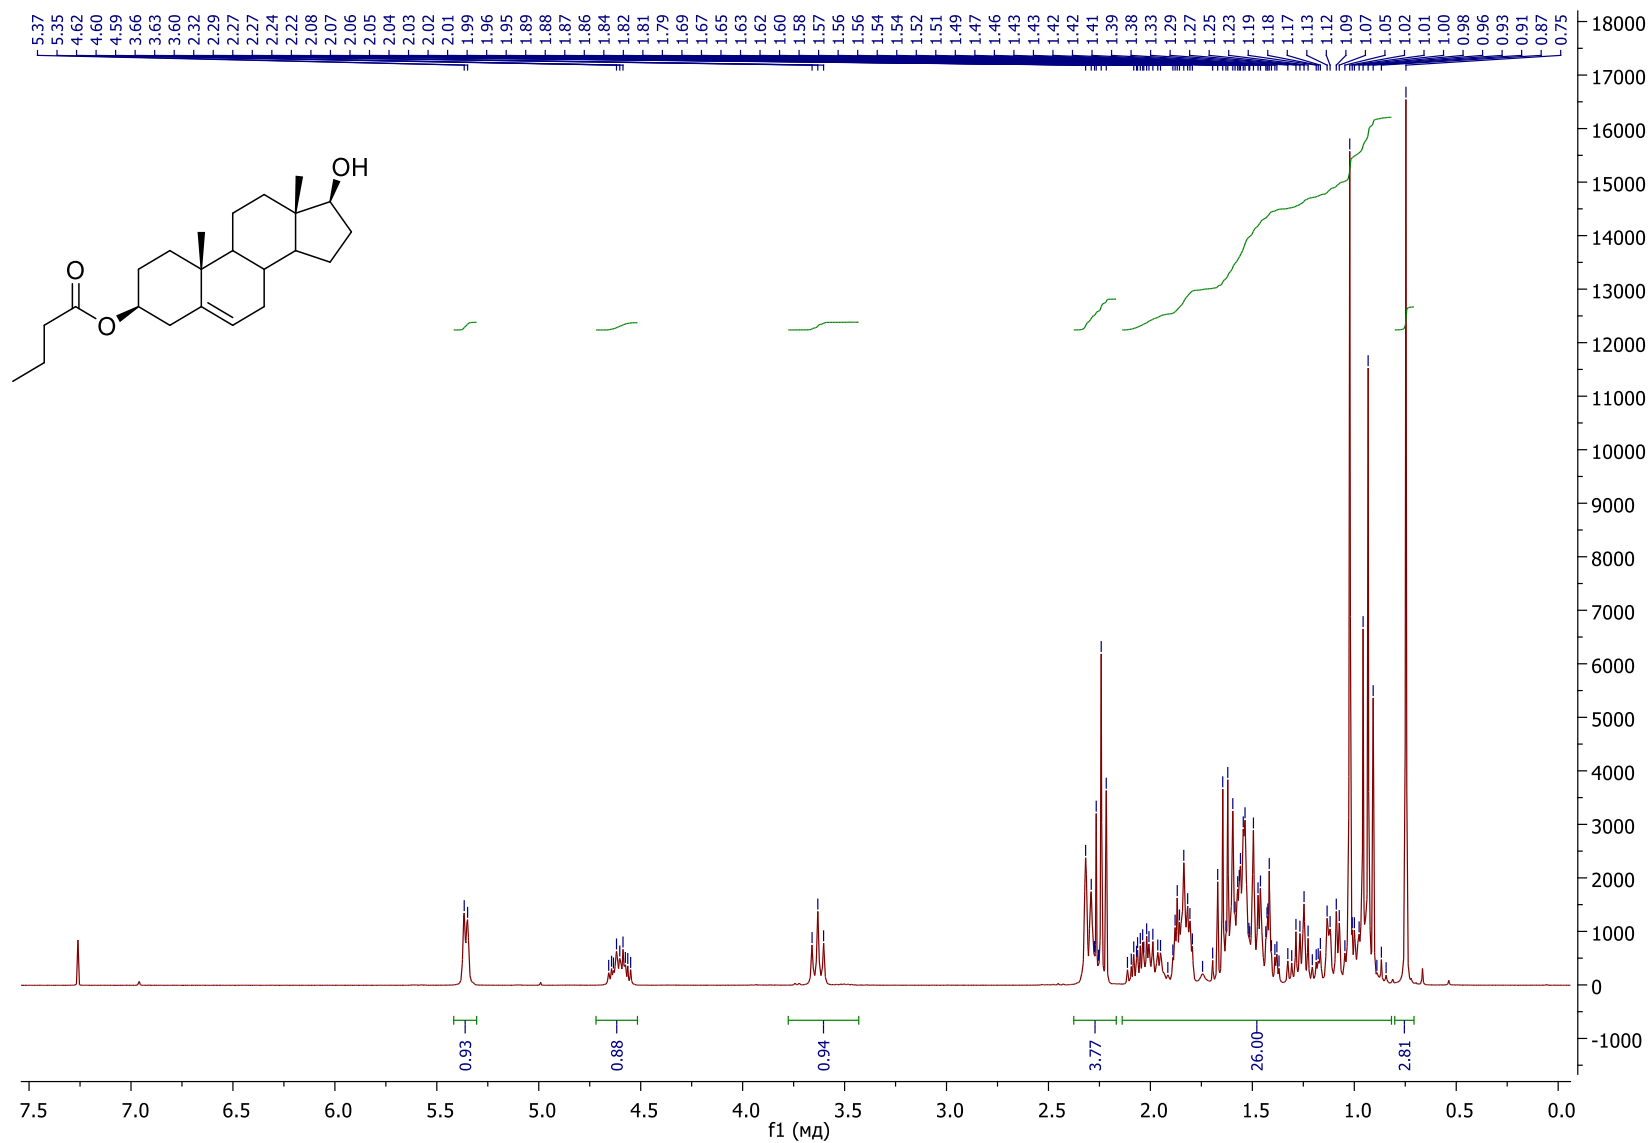



# 5 13C

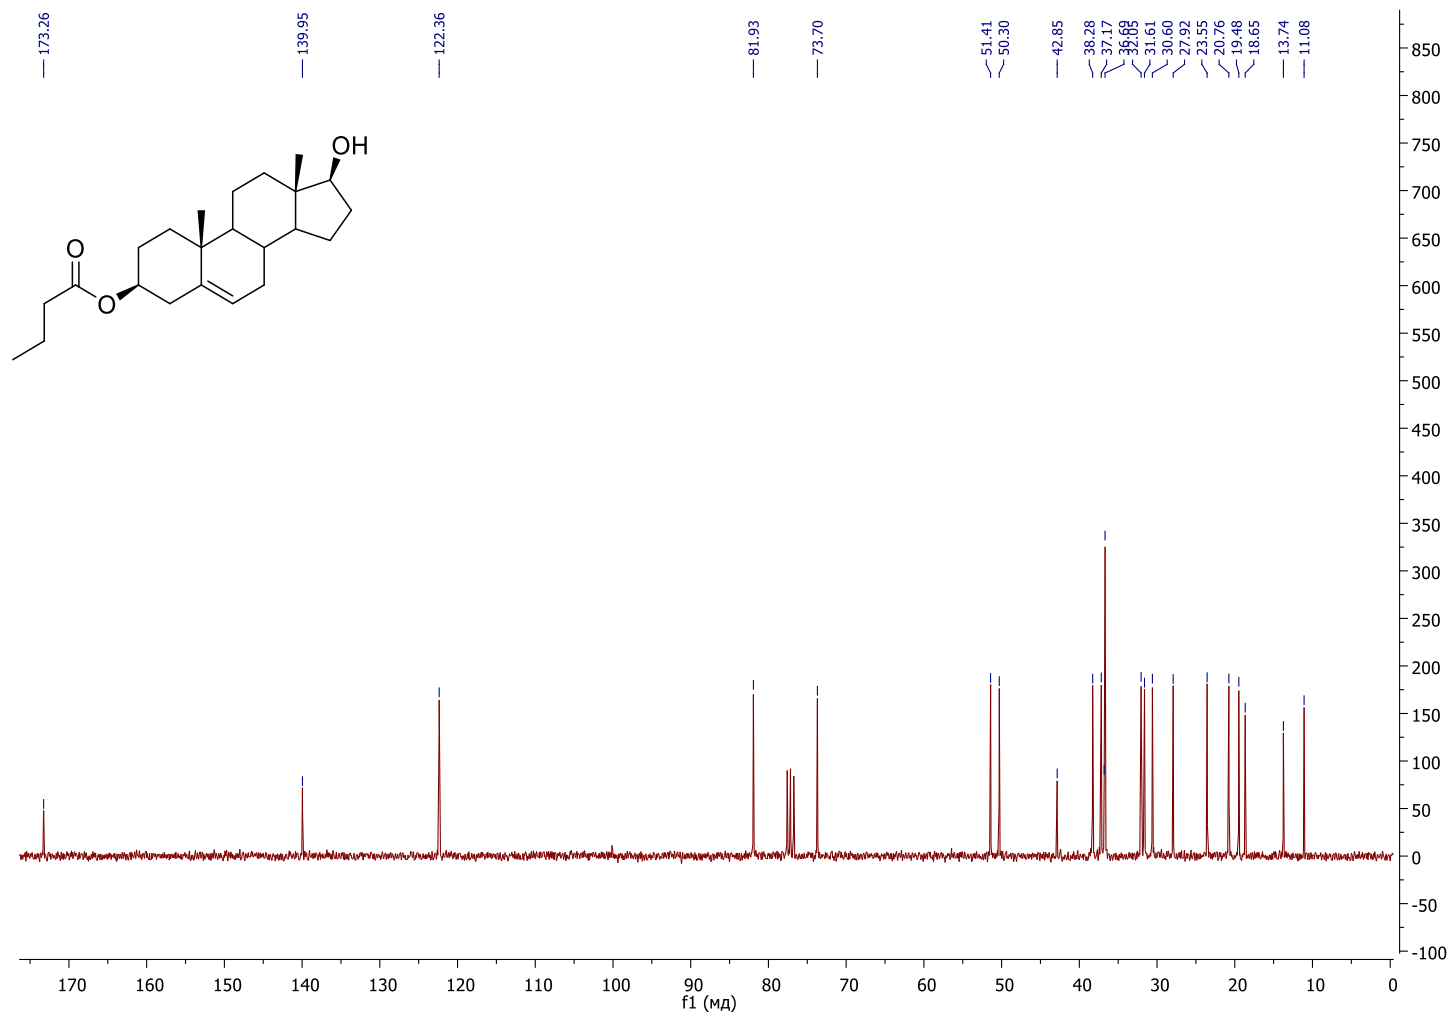

Supplement: s1 [file s1]
